# Supplementary material
Source: Springer Nature journal article supplement (https://www.springermedizin.de/resource/supplementary/12885_2013_4240_MOESM2_ESM.pdf/9465868)

p-STAT3

cytokeratin

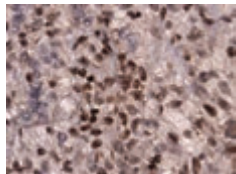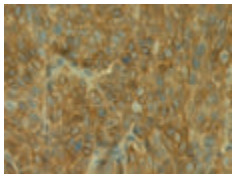

Control

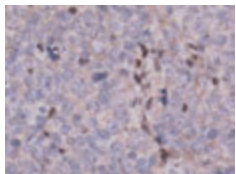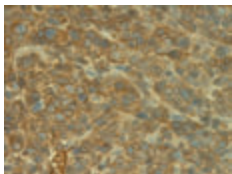

5 mg/kg

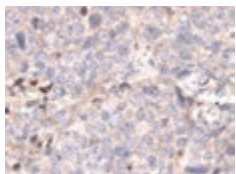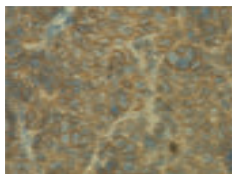

10 mg/kg

% of C666-1 cells with positive staining of p-STAT3

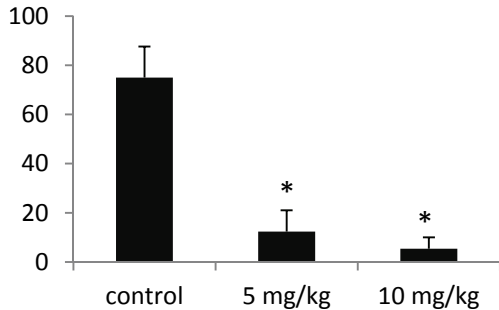

Supplement: MOESM2 [file 9465868]
